# Supplementary material
Source: publisher figshare collection journal article supplement (https://acs.figshare.com/ndownloader/files/3729004)
Supplement: Supplementary file 1 [file 3729004]

# **Role of $\text{Na}^+$ Interstitials and Dopants in Enhancing the $\text{Na}^+$ Conductivity of the Cubic $\text{Na}_3\text{PS}_4$ Superionic Conductor**

Zhuoying Zhu, Iek-Heng Chu, Zhi Deng, and Shyue Ping Ong\*

*Department of NanoEngineering, University of California, San Diego, 9500 Gilman Drive,  
Mail Code 0448, La Jolla, CA 92093, USA*

E-mail: [ongsp@eng.ucsd.edu](mailto:ongsp@eng.ucsd.edu)

Table S1: Average site occupancies for pristine t-Na<sub>3</sub>PS<sub>4</sub>, pristine and doped c-Na<sub>3</sub>PS<sub>4</sub> compounds with different dopant concentrations  $x$  at 800K. To compare with the case of c-Na<sub>3</sub>PS<sub>4</sub>, we artificially label the Na sites in t-Na<sub>3</sub>PS<sub>4</sub> as Na1, whereas the middle points between any two neighboring Na sites are labeled as Na2.

|                                   | Structures             | $x$    | Na1 site occupancy | Na2 site occupancy |
|-----------------------------------|------------------------|--------|--------------------|--------------------|
| t-Na <sub>3</sub> PS <sub>4</sub> | pristine               |        | 0.88               | 0.06               |
|                                   | pristine               |        | 0.84               | 0.08               |
|                                   | Na <sup>+</sup> excess |        | 0.68               | 0.17               |
| c-Na <sub>3</sub> PS <sub>4</sub> | Si-doped               | 0.0625 | 0.76               | 0.13               |
|                                   | Ge-doped               | 0.0625 | 0.62               | 0.20               |
|                                   | Sn-doped               | 0.0625 | 0.79               | 0.12               |

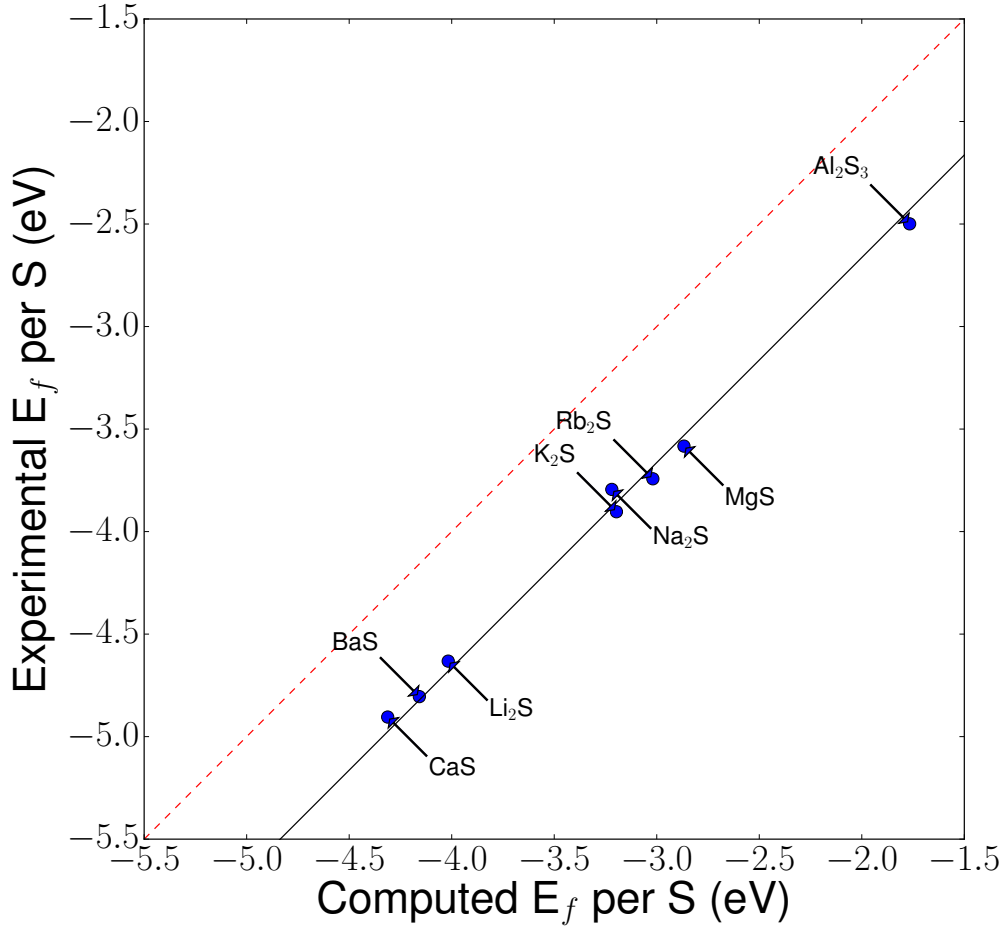

Figure S1: (Color online) Determination of energy difference constant (0.66 eV per S atom) between the DFT and experimental formation energies for sulfides.

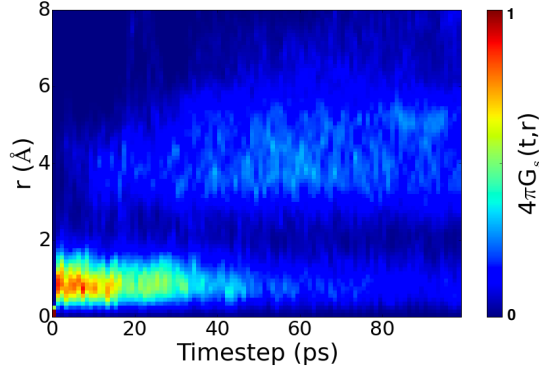

(a) M=Si,  $x=0.0625$

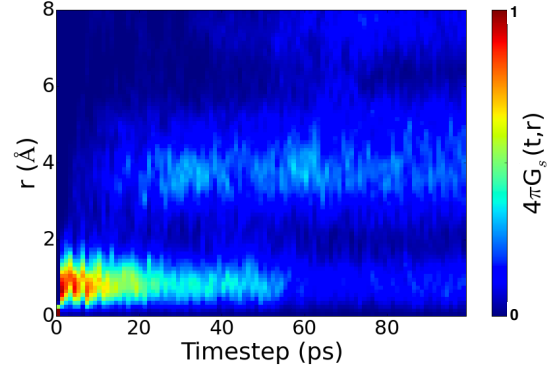

(b) M=Ge,  $x=0.0625$

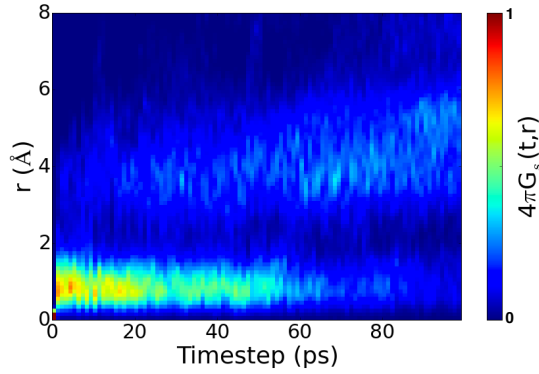

(c) M=Sn,  $x=0.0625$

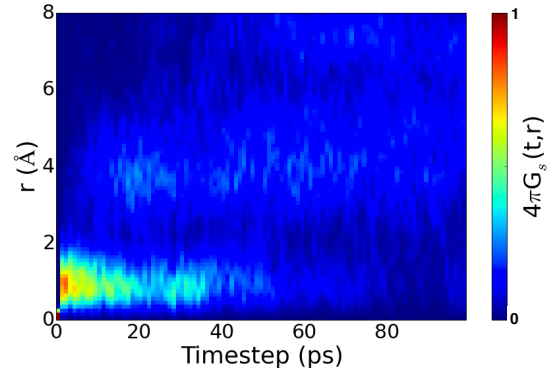

(d) M=Si,  $x=0.125$

Figure S2: (Color online) Plots of the self-part of the van Hove correlation function ( $G_s$ ) for  $\text{Na}_{3+x}\text{M}_x\text{P}_{1-x}\text{S}_4$  at 800 K.  $G_s$  is a function of the Na-Na pair distance  $r$  and time  $t$ .
